# Supplementary material for: The Novel ncRNA OsiR Positively Regulates Expression of katE2 and is Required for Oxidative Stress Tolerance in Deinococcus radiodurans
Source: MDPI journal article supplement (doi:10.3390/ijms21093200), 2020-04-30
Supplement: s1 [file s1]

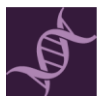

# Supplementary Materials: The Novel ncRNA OsiR Positively Regulates Expression of *katE2* and Is Required for Oxidative Stress Tolerance in *Deinococcus radiodurans*

## 1. Supplementary Tables

**Table S1.** Distribution of homologous genes of *katE1* and *katE2* in *Deinococcus* species.

| Species                    | <i>katE1</i> of homologous genes<br>(number) | Identity<br>(%) | <i>katE2</i> of homologous genes<br>(number) | Identity<br>(%) |
|----------------------------|----------------------------------------------|-----------------|----------------------------------------------|-----------------|
| <i>D. radiodurans</i>      | 1                                            |                 | 1                                            |                 |
| <i>D. wulumuqiensis</i>    | 1                                            | 96.83           | 1                                            | 88.39           |
| <i>D. reticulitermitis</i> | 1                                            | 87.64           | 1                                            | 65.96           |
| <i>D. sp K2S05-167</i>     |                                              |                 | 1                                            | 61.52           |
| <i>D. sp.FeSDHB5-19</i>    |                                              |                 | 1                                            | 67.08           |
| <i>D. proteolyticus</i>    | 1                                            | 85.91           | 1                                            | 58.70           |
| <i>D. radiophilus</i>      | 1                                            | 84.62           | 1                                            | 59.08           |
| <i>D. ficus</i>            |                                              |                 | 1                                            | 60.40           |
| <i>D. irradiatisoli</i>    | 1                                            | 78.22           | 1                                            | 58.36           |
| <i>D. sp H1</i>            |                                              |                 | 1                                            | 59.12           |
| <i>D. sp S14-83</i>        |                                              |                 | 1                                            | 58.79           |
| <i>D. sp leaf326</i>       | 1                                            | 82.90           |                                              |                 |
| <i>D. sp S9</i>            | 1                                            | 78.07           |                                              |                 |
| <i>D. geothermalis</i>     | 1                                            | 78.07           |                                              |                 |
| <i>D. phoenicis</i>        | 1                                            | 77.97           |                                              |                 |
| <i>D. sp YIM 77859</i>     | 1                                            | 78.10           |                                              |                 |
| <i>D. metallitatus</i>     | 1                                            | 76.65           |                                              |                 |
| <i>D. deserti</i>          | 1                                            | 74.71           |                                              |                 |
| <i>D. aerius</i>           | 1                                            | 74.95           |                                              |                 |
| <i>D. apachensis</i>       | 1                                            | 72.62           |                                              |                 |
| <i>D. planocerae</i>       | 1                                            | 72.61           |                                              |                 |
| <i>D. sp RL</i>            | 1                                            | 77.71           |                                              |                 |
| <i>D. murrayi</i>          | 1                                            | 77.71           |                                              |                 |
| <i>D. yavapaiensis</i>     | 1                                            | 71.57           |                                              |                 |

Red indicates that the homologous genes of *katE1* and *katE2* coexist in the same bacteria.

Table S2. Primers used in this study.

| Primer Name                                                                                                                                                                                                                                                      | Sequences (5'–3')                                                                                                                                                                                                                                                                                                                                                                                                                                                                                        | Purpose                                        |
|------------------------------------------------------------------------------------------------------------------------------------------------------------------------------------------------------------------------------------------------------------------|----------------------------------------------------------------------------------------------------------------------------------------------------------------------------------------------------------------------------------------------------------------------------------------------------------------------------------------------------------------------------------------------------------------------------------------------------------------------------------------------------------|------------------------------------------------|
| osiR-P1<br>osiR-P2                                                                                                                                                                                                                                               | ACCGAGGACCTGATCGAGGCTGC<br>GAGTTTTTCTAATCATTTGCCACGCAGAAGTTG                                                                                                                                                                                                                                                                                                                                                                                                                                             | $\Delta$ osiR deletion mutant<br>construction  |
| osiR-P3<br>osiR-P4<br>osiR-P5<br>osiR-P6                                                                                                                                                                                                                         | GTGGGCAAATGATTAGAAAACTCATCGAGCATCAAATG<br>GCTAAAATACAGACCATGGAGACCGAGGGCCCTTGACATT<br>CCTCGGTCTCCATGGTCTGTATTTAGCGTGTTAG<br>GTTCCGTCGCGCCCGTCACTTCG                                                                                                                                                                                                                                                                                                                                                      |                                                |
| katE2-P1<br>katE2-P2                                                                                                                                                                                                                                             | CGCCGCGCTCGCCATCAGTG<br>CAAGGGCCCTCGGTCTCCATGCAGAGCGCGGCCCTTTTCGGGA                                                                                                                                                                                                                                                                                                                                                                                                                                      | $\Delta$ katE2 deletion mutant<br>construction |
| katE2-P3<br>katE2-P4                                                                                                                                                                                                                                             | TCCCGAAAAGGCCGCGCTCTGCATGGAGACCGAGGGCCCTTG<br>GCCACCTTGAGGACTAATGGTTTAGAAAACTCATCGAGC                                                                                                                                                                                                                                                                                                                                                                                                                    |                                                |
| katE2-P5<br>katE2-P6<br>qosiR-F<br>qosiR-R<br>qkatE2-F<br>qkatE2-R<br>qkatE1-F<br>qkatE1-R<br>qDR_1279-F<br>qDR_1279-R<br>qDR_1546-F<br>qDR_1546-R<br>qDR_A0202-F<br>qDR_A0202-R<br>qDR_A0301-F<br>qDR_A0301-R<br>qDR_A0145-F<br>qDR_A0145-R<br>q16S-F<br>q16S-R | GCTCGATGAGTTTTTCTAAACCATTAGTCCTCAAGGTGGC<br>TGACAGACAGCGCCTCGGGC<br>GTCTGACCTCGACCTCACCAC<br>GGCAAATGATGCGGCCCTCAAGC<br>TGGGCAAGATGGTCCTCG<br>CAGCGGGTCGTTGGTGA<br>ACCAACATCCAGTCGCAG<br>CCTTCACCCTGGTCGTTG<br>CCGCACGATGGAAATTCACC<br>CAGAACATGCTGTGGTTGGC<br>CTTTAGCCCCAGTCCCATCG<br>ACCGTAATCATCGGCAGGTC<br>CTGAACCGCAGTCTGGTCAT<br>AAGCCTTTCTTCGCGTCGTA<br>TCGACAAGGCCGAGTGTTTT<br>GAGGCCGATGTCTTCGTTGA<br>GACGATATTCAGGCGACCGT<br>CCACTTTGAACGACTCGGGA<br>ATTCCTGGTGTAGCGGTG<br>CATCGTTTAGGGTGTGGAC | qRT-PCR                                        |
| 5S-NP                                                                                                                                                                                                                                                            | Dig-5'GTATCATTGGCGCTGCTGTGTTTCACGACCCAGTT                                                                                                                                                                                                                                                                                                                                                                                                                                                                | Northern blot                                  |
| OsiR-NP<br>GSP1<br>GSP2<br>GSP3                                                                                                                                                                                                                                  | Dig-5'TGTATTCGTCTGACCTCGACCTCACCACCAA<br>5'-GACGTGCAGGAAGATGTGGTGGACGCTGTGTTTC-3'<br>5'-GTGTTTCGCAACTTCTGCGTGGGCAAATGATGC-3'<br>5'-CAAGCGCTCCGGCGCAGGCGGCGTTCCAGCCAG-3'                                                                                                                                                                                                                                                                                                                                  | 5'RACE                                         |

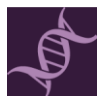

**Table A3.** Synthesized ssRNA oligonucleotide derivatives for MST.

| Name             | Sequence (5'–3')                                                                                                                                                                                                                                                                                | Relevant Characteristics                                                      |
|------------------|-------------------------------------------------------------------------------------------------------------------------------------------------------------------------------------------------------------------------------------------------------------------------------------------------|-------------------------------------------------------------------------------|
| OsiR-wt          | AUGUAUUCGUCUGACCUCGACCUCACCACCAAAGCCCUCAUGCGCGAAC<br>AGGCCCUUCACGAGCCGCAGGCCAUGACCUCAUGGGAAGCUCAUGACCG<br>CCGCGAAAGCCGCAGCGUGCGCCGCGCCUGAACUGGCUGGAACGCCGC<br>CUGCGCCGGAGCGCUUGAGGCCGCAUCAUUUGCCCACGCAGAAGUUGCG<br>AAACACA <u>GCGUCCACCA</u> <u>CAUCUUCUGC</u> ACGUCCUGACCGGUGAGCUCG<br>GCCAGG  | wild type (251 bp), interaction with <i>katE2</i> -wt                         |
| OsiR-mut         | AUGUAUUCGUCUGACCUCGACCUCACCACCAAAGCCCUCAUGCGCGAAC<br>AGGCCCUUCACGAGCCGCAGGCCAUGACCUCAUGGGAAGCUCAUGACCG<br>CCGCGAAAGCCGCAGCGUGCGCCGCGCCUGAACUGGCUGGAACGCCGC<br>CUGCGCCGGAGCGCUUGAGGCCGCAUCAUUUGCCCACGCAGAAGUUGCG<br>AAACACA <u>CGCAGGUGGA</u> <u>GUAGAACGACG</u> ACGUCCUGACCGGUGAGCUCG<br>GCCAGG | mismatch mutation (251 bp), no binding affinity with<br><i>katE2</i> -wt      |
| OsiR-com         | AUGUAUUCGUCUGACCUCGACCUCACCACCAAAGCCCUCAUGCGCGAAC<br>AGGCCCUUCACGAGCCGCAGGCCAUGACCUCAUGGGAAGCUCAUGACCG<br>CCGCGAAAGCCGCAGCGUGCGCCGCGCCUGAACUGGCUGGAACGCCGC<br>CUGCGCCGGAGCGCUUGAGGCCGCAUCAUUUGCCCACGCAGAAGUUGCG<br>AAACACA <u>GCGUCCACCG</u> <u>CAUCUUCUGC</u> ACGUCCUGACCGGUGAGCUCG<br>GCCAGG  | compensatory mutation (251 bp), stronger interaction with<br><i>katE2</i> -wt |
| <i>katE2</i> -wt | UGCUCGGCGUCAAGAGCCUGGUGUGGGACGAAGC <u>GCAGAAGAUUGCCG</u><br><u>GUAAAGGACGC</u> CGACUUCACCG                                                                                                                                                                                                      | wild type (70 bp), interaction with osiR-wt                                   |
| N.               | UGCUCGGCGUCAAGAGCCUGGUGUGGGACGAAGC <u>GCGUCCACCACAUCU</u><br><u>UCCUGCCTACGACUUCACC</u>                                                                                                                                                                                                         | ompletely mismatched (70 bp), no binding<br>with osiR-wt                      |

wt: wild type; mut: mutation; com: supplementary mutation; N.C: negative control. The base pairing region of OsiR with *katE2* mRNA is shown in red. Point mutations introduced into synthesized oligonucleotide derivatives are shown in green.

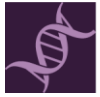

## 2. Supplementary Figure

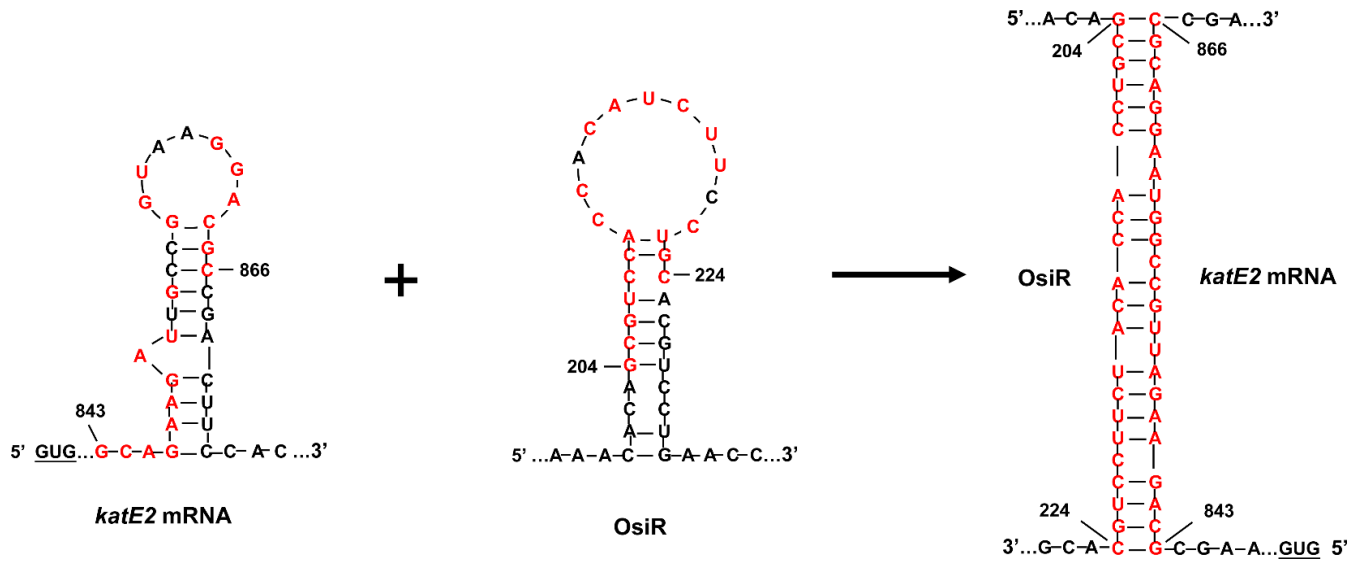

**Figure S1.** Schematic of the interaction between OsiR and *katE2* mRNA. The secondary structure of the *katE2* mRNA contains a putative hairpin structure (nucleotides 846–873), which includes the OsiR binding site, presumably forming an inhibitory structure that affects translation efficiency. The binding of OsiR and *katE2* mRNA promotes the ribosome binding and progression.
